# Supplementary material for: Artificial Intelligence Modelling to Support the Groundwater Chemistry-Dependent Selection of Groundwater Arsenic Remediation Approaches in Bangladesh
Source: MDPI journal article supplement (doi:10.3390/w15203539), 2023-10-11
Supplement: s1 [file s1]

## Supplementary Information

# Artificial Intelligence Modelling to Support the Groundwater Chemistry-Dependent Selection of Groundwater Arsenic Remediation Approaches in Bangladesh

Ruohan Wu <sup>1,\*</sup>, Laura A. Richards <sup>1,\*</sup>, Ajmal Roshan <sup>1,2</sup>, David A. Polya <sup>1</sup>

<sup>1</sup> Department of Earth and Environmental Sciences, School of Natural Sciences and Williamson Research Centre for Molecular Environmental Sciences, The University of Manchester, M13 9PL, United Kingdom

<sup>2</sup> Department of Infrastructure Engineering, Faculty of Engineering and Information Technology, The University of Melbourne, Victoria 3010 Australia

\* Co-Correspondence: laura.richards@manchester.ac.uk (LR); ruohan.wu@manchester.ac.uk (RW)

## Supplementary Materials

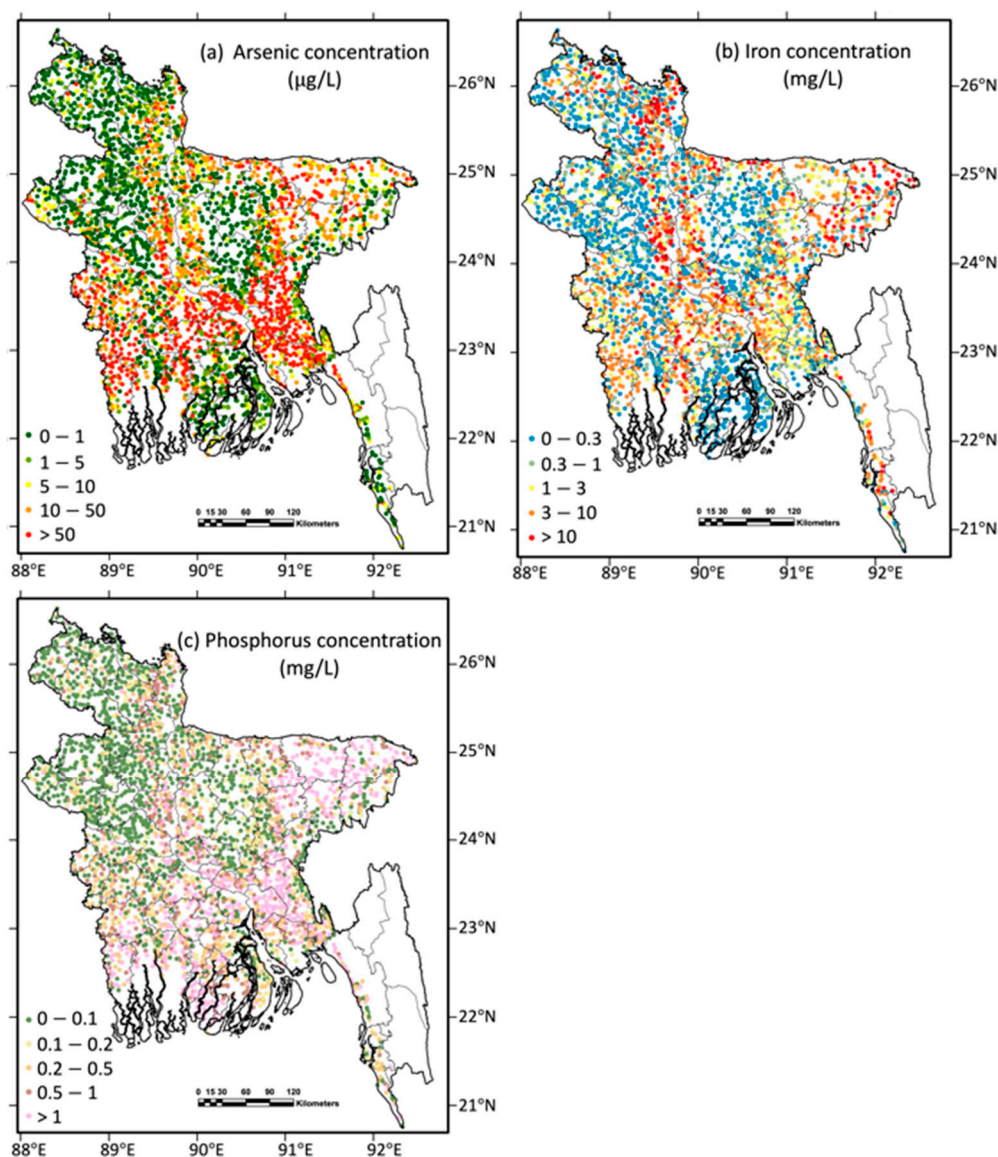

**Figure S1.** Distribution of secondary groundwater concentration data reported by (DPHE / BGS, 2001) of (a) As, (b) Fe, and (c) P in Bangladesh.

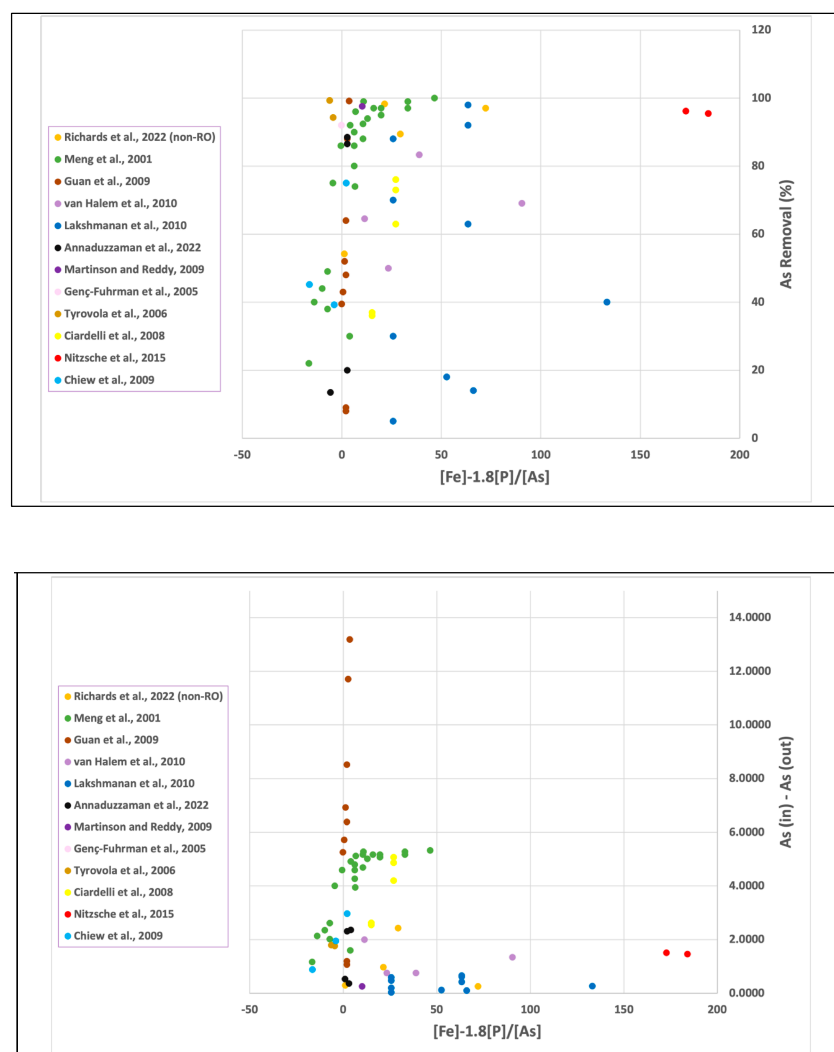

**Figure S2.** Meta-analysis plot of (top) measured As removal (%) versus molar ratio of  $\frac{[Fe] - 1.8[P]}{[As]}$  and (bottom) measured As removal (absolute, expressed as  $As (in) - As (out)$ ,  $\mu M$ ) for adsorption or co-precipitation based arsenic removal technologies, in either field or laboratory settings. Data compiled from Meng et al., 2001 (co-precipitation using ferric salts followed by filtration using 0.4  $\mu m$  membrane filter and co-precipitation using ferric and hypochlorite salts followed by filtration using bucket sand filter), Genç-Fuhrman et al., 2005 (adsorption onto Activated Bauxsol Coated sand), Tyrovola et al., 2006 (removal using columns filled with sand and iron filings in series), Ciardelli et al., 2008 (removal using addition of Fe(II) aided by natural oxidation; removal using addition of Fe(II) aided by natural oxidation and followed by seeding using hydroxylapatite crystals immediately; two-step process that has a gap in between Fe(II) and hydroxylapatite addition), Guan et al., 2009 (KMnO<sub>4</sub>-Fe(II) process for As(III) removal), Martinson and Reddy, 2009 (CuO nanoparticles), Chiew et al., 2009 (household BioSand filter amended with iron nails), van Halem et al., 2010 (community-scale facility using subsurface As removal and adsorptive-catalytic oxidation mechanism), Lakshmanan et al., 2010 (FeCl<sub>3</sub> chemical coagulation), Nitzsche et al., 2015 (household sand filter), Annaduzzaman et al., 2022 (adsorption onto hydrous ferric oxides), Richards et al., 2022b (removal by homemade bucket filtration system (non-RO) and multi-stage filtration system in a non-household setting and multi-stage filtration system (non-RO) in a non-household setting are included, and removal by reverse osmosis (RO)-based technology are excluded).

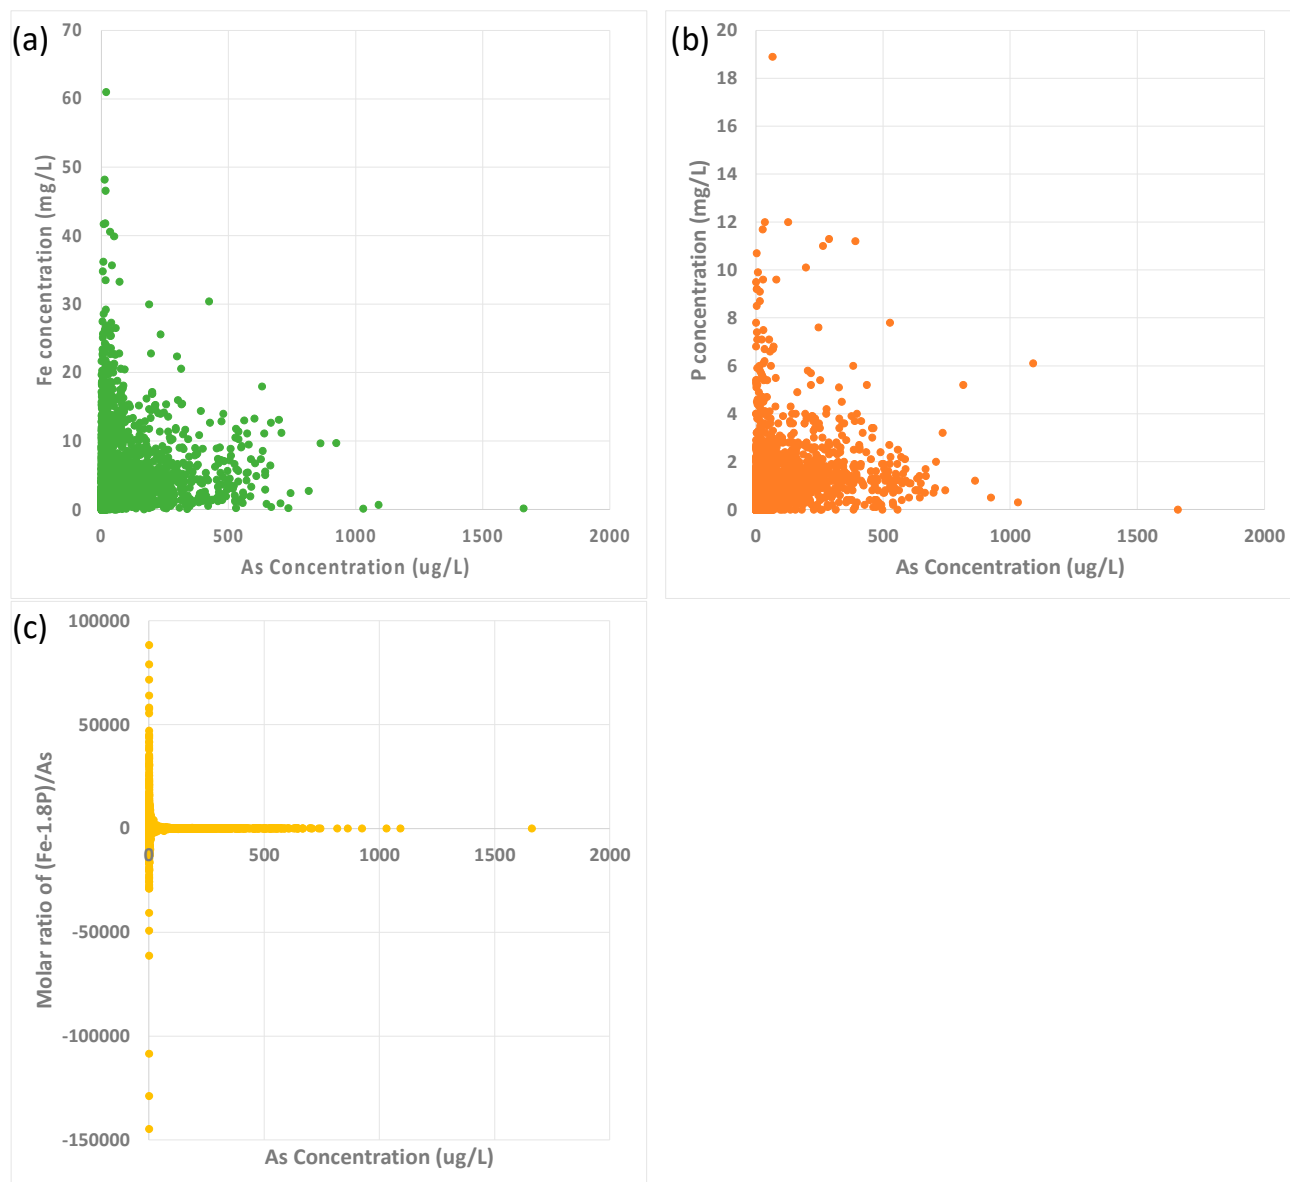

**Figure S3.** Bivariate plots between groundwater concentrations of (a) Fe and (b) P and (c) molar ratio of  $([\text{Fe}] - 1.8[\text{P}]) / [\text{As}]$  versus As (As in (c) is  $> 10 \mu\text{g/L}$ ), Fe, P and As data all from (DPHE / BGS, 2001).

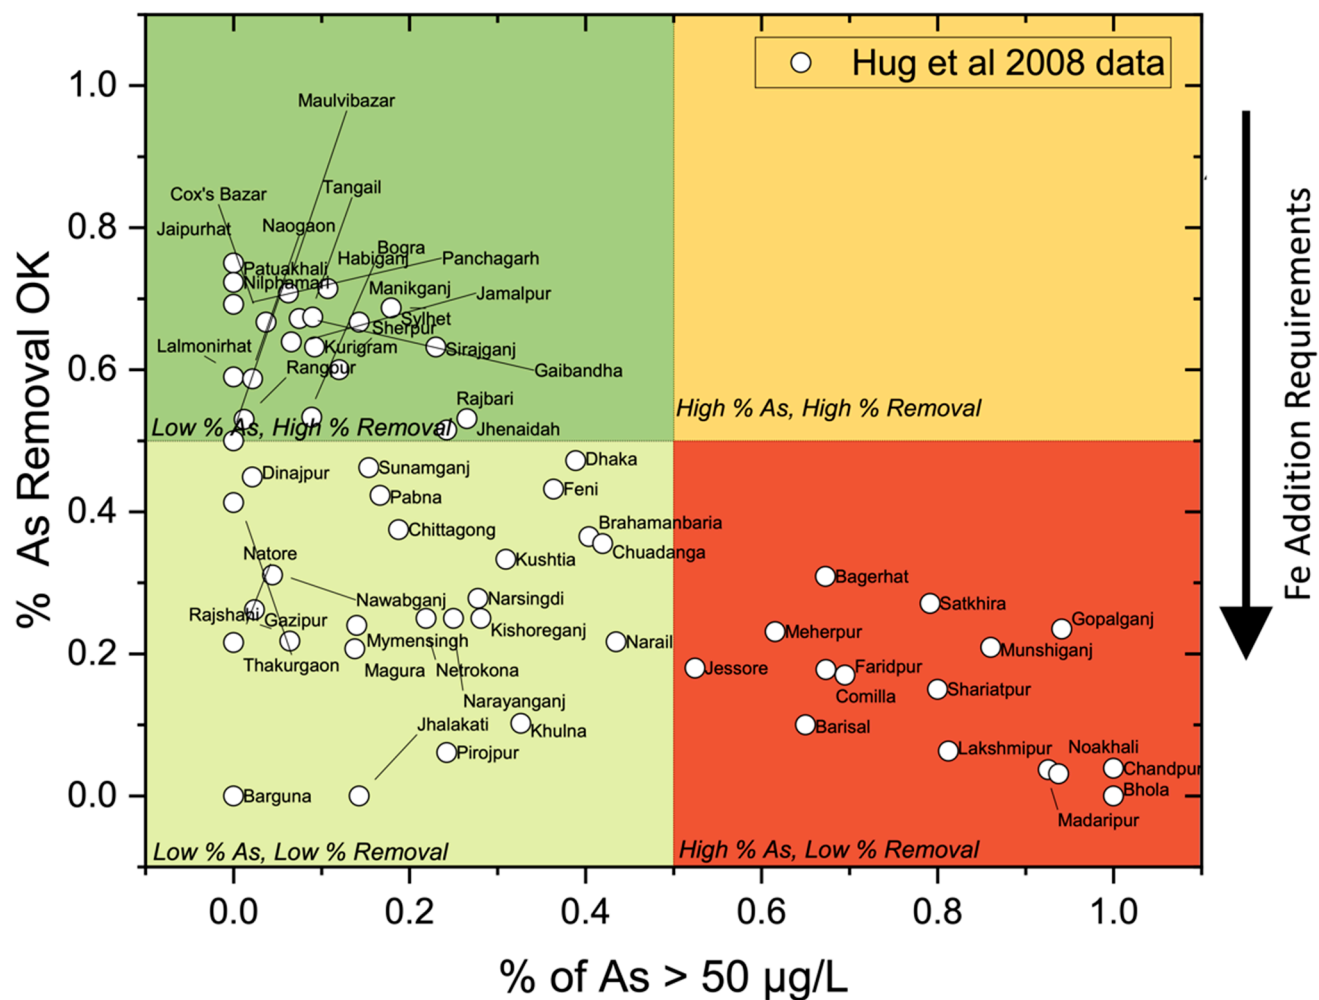

**Figure S4.** District-level sampled As remediation efficiency (% of samples with As removal OK) versus the percentage of samples with groundwater arsenic exceeding 50 µg/L based on Hug et al (2008) data.

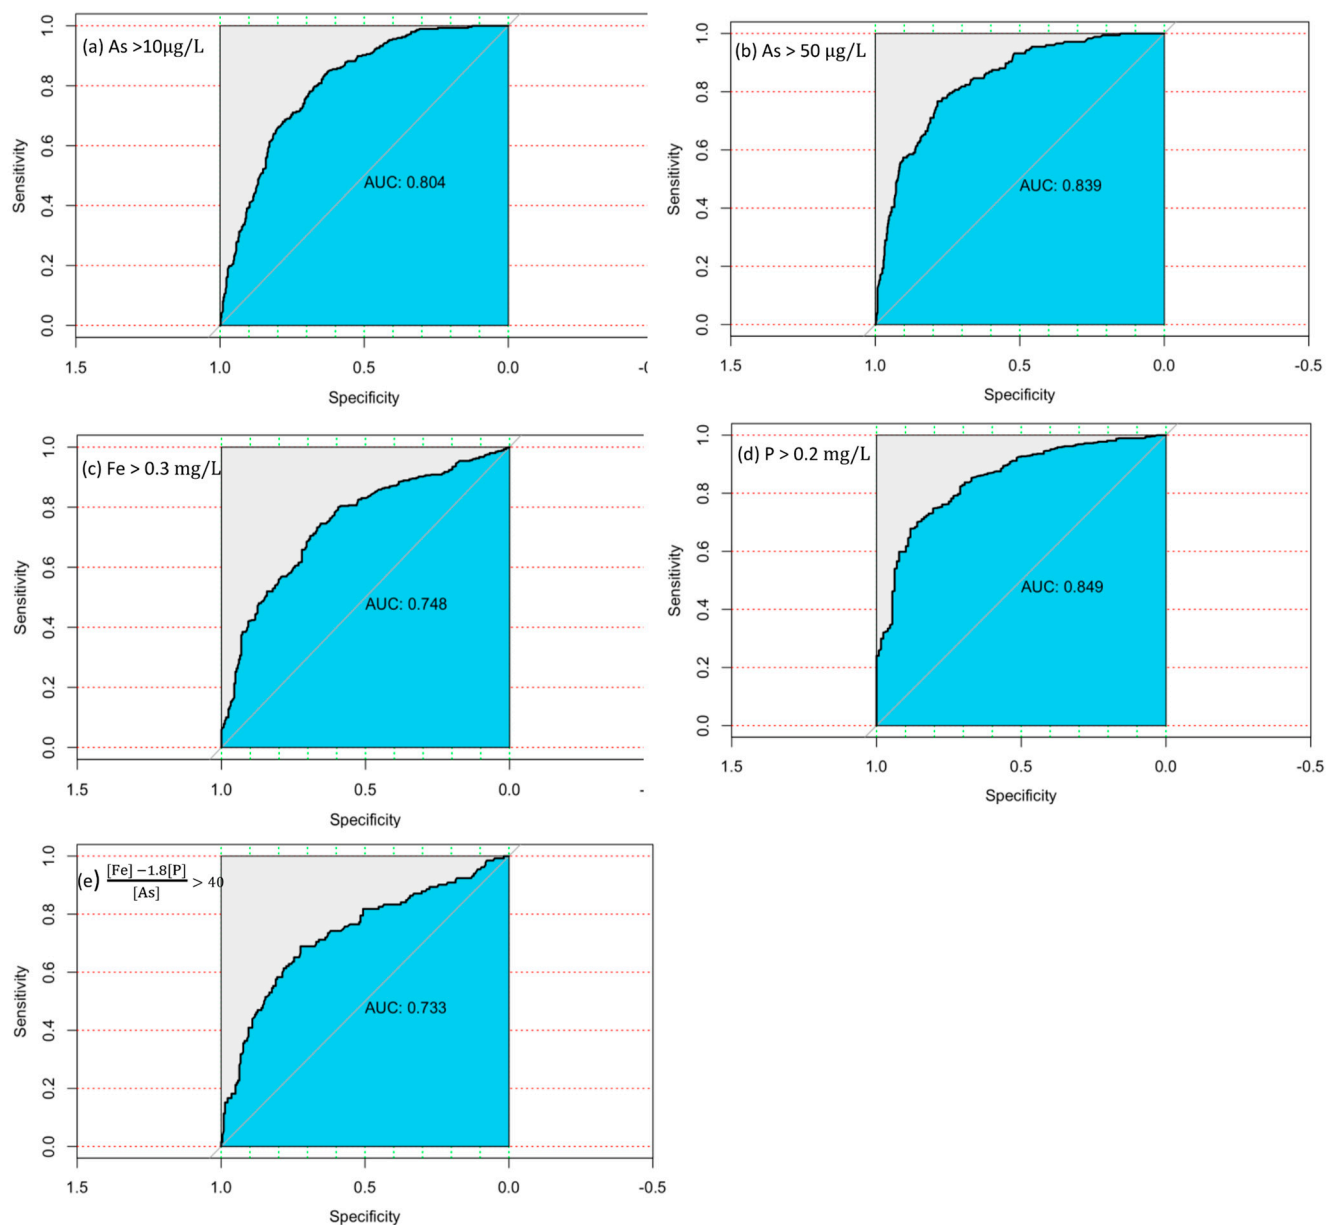

**Figure S5.** AUC curves of generated random forest models (this study) of distribution of (a) As > 10  $\mu\text{g/L}$ , (b) As > 50  $\mu\text{g/L}$ , (c) Fe > 0.3 mg/L, (d) P > 0.2 mg/L, and (e) molar ratio of  $([\text{Fe}] - 1.8[\text{P}]) / [\text{As}] > 40$ .

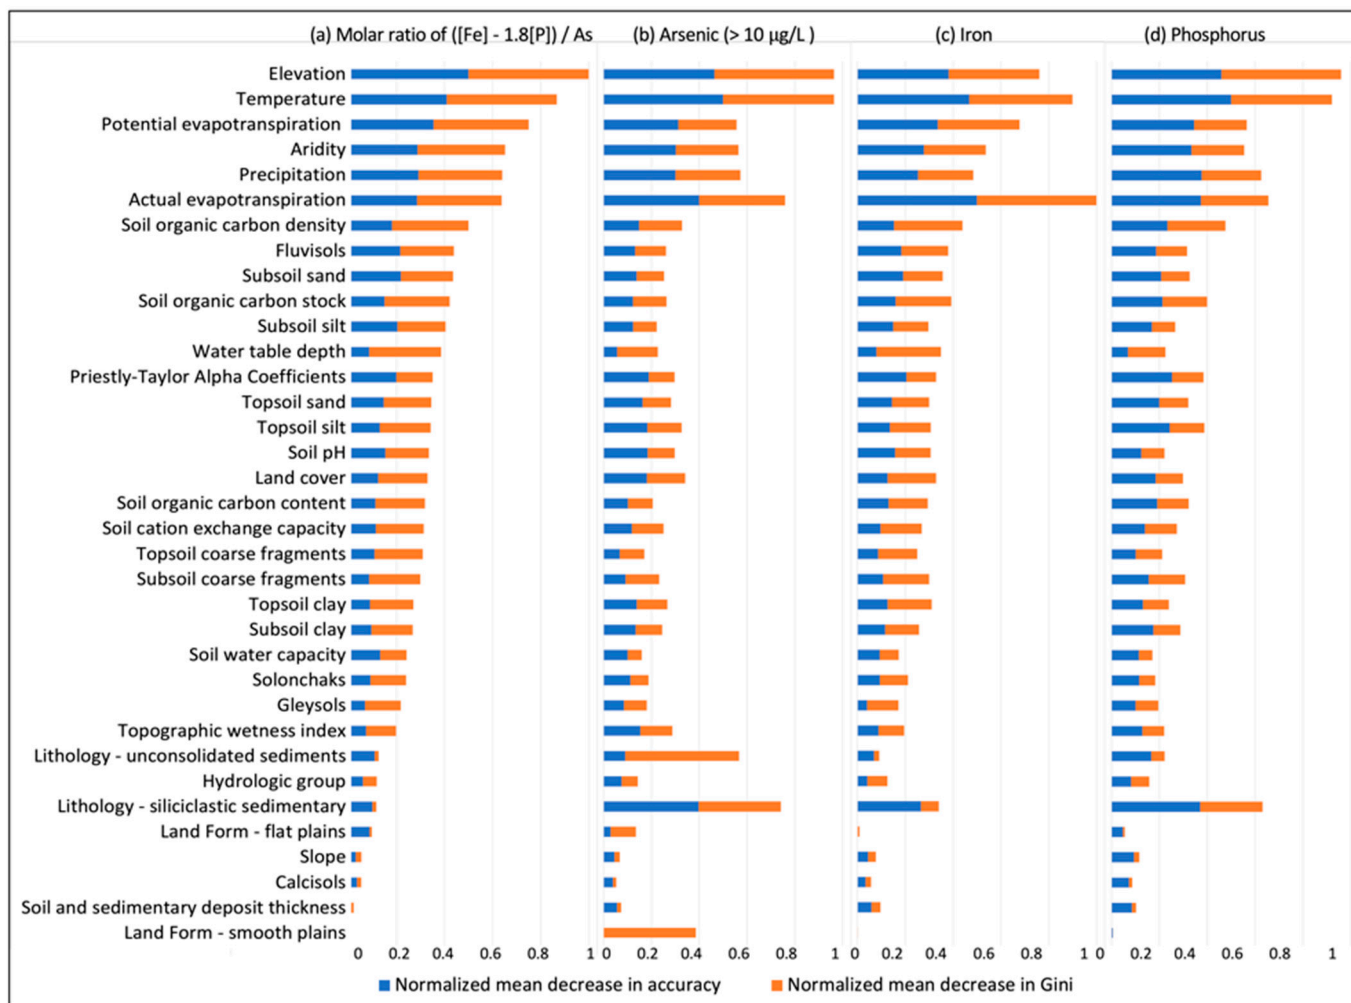

**Figure S6.** Normalized importance of predictors in terms of mean decrease values in accuracy and in Gini node impurity in the random forest models (this study) of distribution of (a) As ( $> 10 \mu\text{g/L}$ ), (b) Fe, (c) P, and (d) molar ratio of  $([Fe] - 1.8[P]) / [As]$ . Environmental predictors ( $n=35$ ) for secondary chemical concentration locations were abstracted and a predictor dataset at  $1 \text{ km}^2$  resolution for the whole of Bangladesh was generated in ArcGIS (version 10.2) to finalize the entire dataset for the further modelling and prediction. The importance of the predictors in the four random forest models of As  $> 10 \mu\text{g/L}$ , Fe  $> 0.3 \text{ mg/L}$ , P  $> 0.2 \text{ mg/L}$  and molar ratio of  $([Fe] - 1.8[P]) / [As] > 40$  was assessed by the mean decrease in both accuracy and Gini node impurity, normalized by the maximum value calculated among all predictors. The orders of importance of predictors in four random forest models has certain similarities, and this may be due to the same predictor combination used in different random forest models. The selection of environmental predictors in this study was mainly based on the mobility, releasement, and enrichment mechanisms of As in groundwater (Smedley and Kinniburgh 2002; Islam et al. 2004; McArthur et al. 2004; Charlet and Polya 2006; Polya and Charlet 2009; Rodríguez-Lado et al. 2013; Polya and Middleton 2017; Podgorski et al. 2017; Polya et al. 2019a, b). Therefore, updating the environmental predictor dataset based on various chemicals' mobility mechanisms of As, Fe, and P may improve the models as the distribution of the different target values (i.e. for As, Fe, and P) are related to different geochemistry processes.

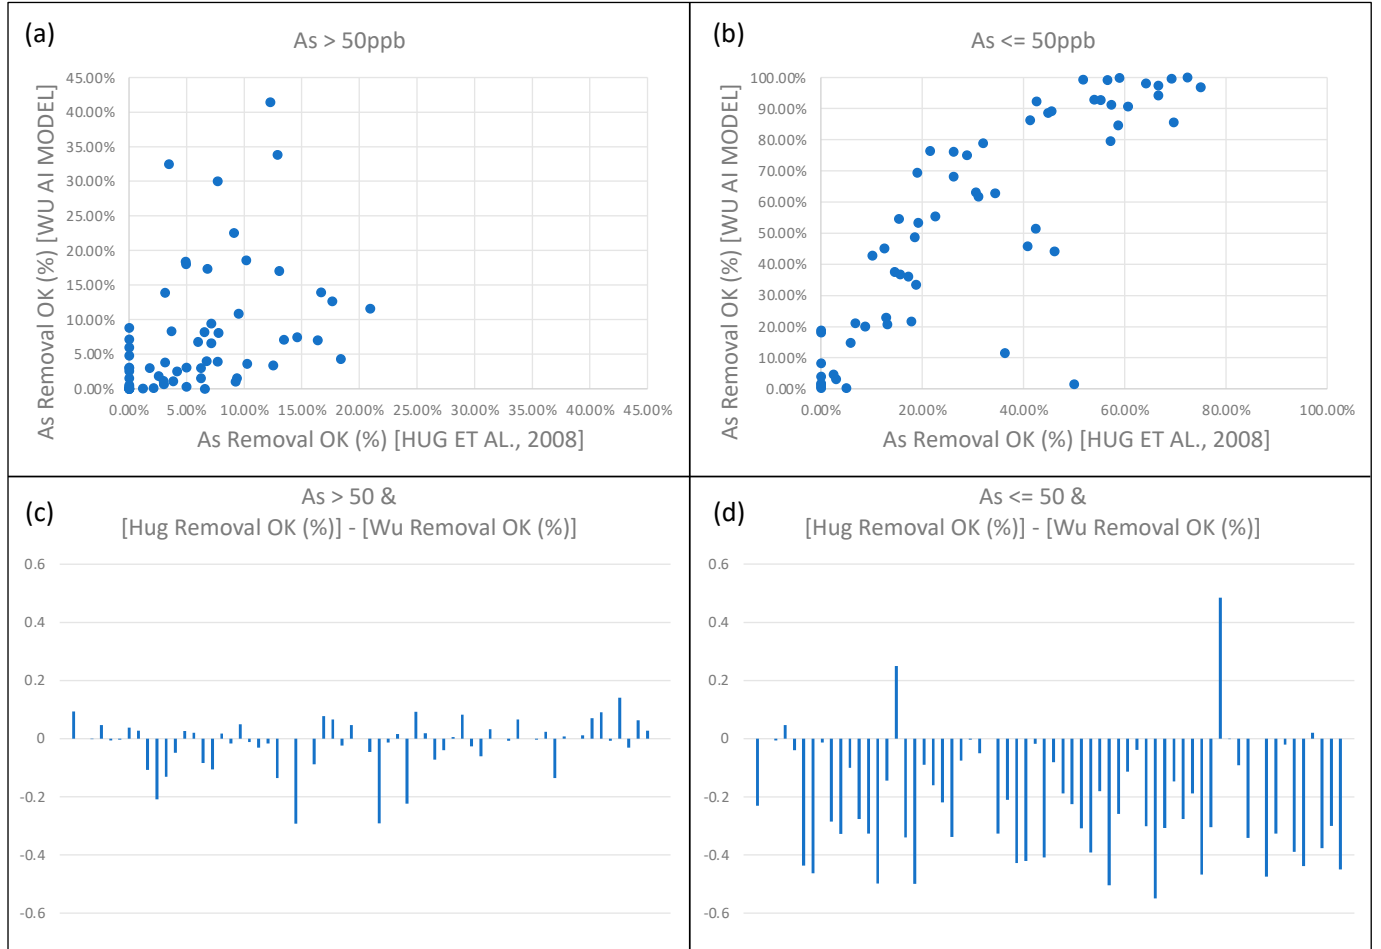

**Figure S7.** Comparison between model-predicted district-level 1 km<sup>2</sup> pixel-level proportion (%) of As removal OK (using molar ratio of 40) with district-level measured well proportion of As removal OK calculated by Hug et al (2008) according to DPHE / BGS National Hydrochemical Survey data (DPHE / BGS, 2001) within 10-90m depth in two different As concentration ranges – 0 - 50 µg/L and > 50 µg/L. (a) model-predicted district-level pixel proportion (%) of As removal OK (using molar ratio of 40) vs. district-level measured well proportion of As removal OK calculated by Hug et al (2008) according to DPHE / BGS National Hydrochemical Survey data in As range of 0 - 50 µg/L; (b) model-predicted district-level pixel proportion (%) of As removal OK (using molar ratio of 40) vs. district-level measured well proportion of As removal OK calculated by Hug et al (2008) according to DPHE / BGS National Hydrochemical Survey data in As range of > 50 µg/L; (c) district-level measured well proportion of As removal OK calculated by Hug et al (2008) according to DPHE / BGS National Hydrochemical Survey data - model-predicted district-level pixel proportion (%) of As removal OK (using molar ratio of 40) vs in As range of 0 - 50 µg/L; (d) district-level measured well proportion of As removal OK calculated by Hug et al (2008) according to DPHE / BGS National Hydrochemical Survey data - model-predicted district-level pixel proportion (%) of As removal OK (using molar ratio of 40) vs in As range of > 50 µg/L.

**Table S1.** Description of predictors used in the random forest models..

| Variable          | Variables                              | Descriptions                                                  | Data Sources             |
|-------------------|----------------------------------------|---------------------------------------------------------------|--------------------------|
| <b>Climate</b>    | Actual evapotranspiration              | Average rate of actual evapotranspiration (mm/yr)             | [Trabucco et al., 2010]  |
| <b>Climate</b>    | Aridity                                | PET/Precipitation                                             | [Trabucco et al., 2009]  |
| <b>Climate</b>    | Potential evapotranspiration           | Average rate of potential evapotranspiration (mm/yr)          | [Trabucco et al., 2009]  |
| <b>Climate</b>    | Precipitation                          | Average rate of precipitation (mm/yr)                         | [Trabucco et al., 2010]  |
| <b>Climate</b>    | Priestley-Taylor alpha coefficient     | AET/PET                                                       | [Trabucco et al., 2010]  |
| <b>Climate</b>    | Temperature                            | Average temperature (°C)                                      | [Trabucco et al., 2009]  |
| <b>Soil</b>       | Calcisols                              | Probability of the occurrence of calcisols                    | [Hengl et al., 2017]     |
| <b>Soil</b>       | Fluvisols                              | Probability of the occurrence of fluvisols                    | [Hengl et al., 2017]     |
| <b>Soil</b>       | Gleysols                               | Probability of the occurrence of gleysols                     | [Hengl et al., 2017]     |
| <b>Soil</b>       | Subsoil clay                           | Weight % of clay particles (<0.0002 mm) at 2 m depth          | [Hengl et al., 2017]     |
| <b>Soil</b>       | Subsoil coarse fragments               | Volume % of coarse fragments (>2 mm) at 2 m depth             | [Hengl et al., 2017]     |
| <b>Soi</b>        | Subsoil sand                           | Weight % of sand particles (0.05 - 2 mm) at 2 m depth         | [Hengl et al., 2017]     |
| <b>Soil</b>       | Subsoil silt                           | Weight % of silt particles (0.0002 - 0.05 mm) at 2 m depth    | [Hengl et al., 2017]     |
| <b>Soil</b>       | Topsoil clay                           | Weight % of clay particles (<0.0002 mm) at 0 m depth          | [Hengl et al., 2017]     |
| <b>Soil</b>       | Topsoil coarse fragments               | Volume % of coarse fragments (>2 mm) at 0 m depth             | [Hengl et al., 2017]     |
| <b>Soi</b>        | Topsoil sand                           | Weight % of sand particles (0.05 - 2 mm) at 0 m depth         | [Hengl et al., 2017]     |
| <b>Soil</b>       | Topsoil silt                           | Weight % of silt particles (0.0002 - 0.05 mm) at 0 m depth    | [Hengl et al., 2017]     |
| <b>Soil</b>       | Soil cation exchange capacity          | Cation exchange capacity (cmolc/kg) at 2 m depth              | [Hengl et al., 2017]     |
| <b>Soil</b>       | Soil pH                                | Soil pH measured in water at 2 m depth                        | [Hengl et al., 2017]     |
| <b>Soil</b>       | Soil organic carbon content            | Soil organic carbon content (g/kg) at 2 m depth               | [Hengl et al., 2017]     |
| <b>Soil</b>       | Soil organic carbon density            | Soil organic carbon density (kg/m <sup>3</sup> ) at 2 m depth | [Hengl et al., 2017]     |
| <b>Soil</b>       | Soil organic carbon stock              | Soil organic carbon stock (t/ha) at 2 m depth                 | [Hengl et al., 2017]     |
| <b>Soil</b>       | Soil and sedimentary deposit thickness | The thickness of soil and sedimentary deposit (m)             | [Pelletier et al., 2016] |
| <b>Soil</b>       | Solonchaks <sup>1</sup>                | Probability of the occurrence of solonchaks                   | [Hengl et al., 2017]     |
| <b>Soil</b>       | Water wilting point                    | Volume % of available soil water until wilting point at 2 m   | [Hengl et al., 2017]     |
| <b>Topography</b> | Slope                                  | Slope (arc)                                                   | [Hengl et al., 2018]     |
| <b>Topography</b> | Elevation                              | Elevation (m)                                                 | [USGS, 1996]             |
| <b>Topography</b> | Landform – flat plains                 | A kind of landform - flat plains                              | [Hengl et al., 2018]     |
| <b>Topography</b> | Landform – smooth plains               | A kind of landform - smooth plains                            | [Hengl et al., 2018]     |
| <b>Topography</b> | Topographic wetness index              | Combination of upslope contributing area and slope            | [Hengl et al., 2018]     |
| <b>Others</b>     | Water table depths                     | Water table depths (m)                                        | [Fan et al., 2013]       |
| <b>Others</b>     | Land cover                             | 17 different categories of land cover                         | [Friedl et al., 2010]    |
| <b>Others</b>     | Lithology - siliciclastic sedimentary  | A kind of lithology - siliciclastic sedimentary rocks         | [Hengl et al., 2018]     |
| <b>Others</b>     | Lithology – unconsolidated sediments   | A kind of lithology - unconsolidated sediments                | [Hengl et al., 2018]     |
| <b>Others</b>     | Hydrologic soil group                  | 4 different hydrologic soil group                             | [Hengl et al., 2017]     |



**Table S2.** Bangladesh district-level comparison between this study and Hug et al (2008) of percentage of groundwater for which satisfactory/OK As removal is predicted. Both models utilise the same secondary data, i.e. DPHE / BGS National Hydrochemical Survey data (DPHE / BGS, 2001) within 10 m -90 m depth range. The blank cell in this table is due to there is no data form Hug et al (2008)'s study.

| District     | Samples included by [HUG ET AL, 2008] | As (mean $\pm$ std) ( $\mu\text{g/L}$ ) [HUG ET AL, 2008] | As ( $\mu\text{g/L}$ ) > 50 [HUG ET AL, 2008] | As removal OK [HUG ET AL, 2008] | As removal OK (%) [HUG ET AL, 2008] | % of As ( $\mu\text{g/L}$ ) $\leq$ 50 & (Fe-1.8P)/As (mol/mol) > 40 [HUG ET AL, 2008] | % of As ( $\mu\text{g/L}$ ) > 50 & (Fe-1.8P)/As (mol/mol) > 40 [HUG ET AL, 2008] | % of As ( $\mu\text{g/L}$ ) > 10 [this study] | % of As removal OK (for all As ranges) [this study] | % of As ( $\mu\text{g/L}$ ) > 50 & As removal OK [this study] | % of As ( $\mu\text{g/L}$ ) $\leq$ 50 & As removal OK [this study] | As removal OK (%) [HUG ET AL, 2008] - % of As removal OK (for all As ranges) [this study] |
|--------------|---------------------------------------|-----------------------------------------------------------|-----------------------------------------------|---------------------------------|-------------------------------------|---------------------------------------------------------------------------------------|----------------------------------------------------------------------------------|-----------------------------------------------|-----------------------------------------------------|---------------------------------------------------------------|--------------------------------------------------------------------|-------------------------------------------------------------------------------------------|
| Bagerhat     | 55                                    | 175 $\pm$ 172                                             | 37                                            | 17                              | 30.9%                               | 14.6%                                                                                 | 16.4%                                                                            | 60.0%                                         | 44.6%                                               | 7.0%                                                          | 37.5%                                                              | -13.7%                                                                                    |
| Bandarban    |                                       |                                                           |                                               |                                 |                                     |                                                                                       |                                                                                  | 0.0%                                          | 100.0%                                              | 8.5%                                                          | 91.5%                                                              |                                                                                           |
| Barguna      | 3                                     | 5 $\pm$ 6                                                 | 0                                             | 0                               | 0.0%                                | 0.0%                                                                                  | 0.0%                                                                             | 0.0%                                          | 0.7%                                                | 0.2%                                                          | 0.6%                                                               | -0.7%                                                                                     |
| Barisal      | 40                                    | 189 $\pm$ 202                                             | 26                                            | 4                               | 10.0%                               | 5.0%                                                                                  | 5.0%                                                                             | 31.6%                                         | 0.6%                                                | 0.3%                                                          | 0.3%                                                               | 9.4%                                                                                      |
| Bhola        | 2                                     | 201 $\pm$ 54                                              | 2                                             | 0                               | 0.0%                                | 0.0%                                                                                  | 0.0%                                                                             | 1.0%                                          | 4.5%                                                | 0.6%                                                          | 4.0%                                                               | -4.5%                                                                                     |
| Bogra        | 90                                    | 18 $\pm$ 70                                               | 8                                             | 48                              | 53.3%                               | 45.6%                                                                                 | 7.8%                                                                             | 12.4%                                         | 97.3%                                               | 8.1%                                                          | 89.2%                                                              | -43.9%                                                                                    |
| Brahmanbaria | 52                                    | 103 $\pm$ 159                                             | 21                                            | 19                              | 36.5%                               | 28.9%                                                                                 | 7.7%                                                                             | 58.1%                                         | 79.0%                                               | 3.9%                                                          | 75.1%                                                              | -42.5%                                                                                    |
| Chandpur     | 52                                    | 410 $\pm$ 178                                             | 52                                            | 2                               | 3.9%                                | 0.0%                                                                                  | 3.9%                                                                             | 96.6%                                         | 2.4%                                                | 1.1%                                                          | 1.3%                                                               | 1.5%                                                                                      |
| Chittagong   | 32                                    | 39 $\pm$ 80                                               | 6                                             | 12                              | 37.5%                               | 34.4%                                                                                 | 3.1%                                                                             | 14.8%                                         | 76.8%                                               | 13.8%                                                         | 62.9%                                                              | -39.3%                                                                                    |
| Chuadanga    | 31                                    | 82 $\pm$ 124                                              | 13                                            | 11                              | 35.5%                               | 22.6%                                                                                 | 12.9%                                                                            | 97.6%                                         | 89.2%                                               | 33.8%                                                         | 55.4%                                                              | -53.7%                                                                                    |
| Comilla      | 101                                   | 150 $\pm$ 152                                             | 68                                            | 18                              | 17.8%                               | 12.9%                                                                                 | 5.0%                                                                             | 84.6%                                         | 41%                                                 | 18.0%                                                         | 22.8%                                                              | -23.0%                                                                                    |
| Cox's Bazar  | 27                                    | 4 $\pm$ 13                                                | 1                                             | 18                              | 66.7%                               | 66.7%                                                                                 | 0.0%                                                                             | 0.0%                                          | 99.0%                                               | 4.8%                                                          | 94.3%                                                              | -32.4%                                                                                    |
| Dhaka        | 36                                    | 51 $\pm$ 71                                               | 14                                            | 17                              | 47.2%                               | 30.5%                                                                                 | 16.7%                                                                            | 66.0%                                         | 77.0%                                               | 13.9%                                                         | 63.1%                                                              | -29.8%                                                                                    |
| Dinajpur     | 94                                    | 3 $\pm$ 8                                                 | 2                                             | 42                              | 44.9%                               | 42.6%                                                                                 | 2.1%                                                                             | 0.0%                                          | 92.5%                                               | 0.1%                                                          | 92.3%                                                              | -47.8%                                                                                    |
| Faridpur     | 59                                    | 149 $\pm$ 155                                             | 41                                            | 10                              | 17.0%                               | 6.8%                                                                                  | 10.2%                                                                            | 94.6%                                         | 39.7%                                               | 18.6%                                                         | 21.2%                                                              | -22.8%                                                                                    |

|              |     |         |    |    |       |       |       |       |        |       |       |        |
|--------------|-----|---------|----|----|-------|-------|-------|-------|--------|-------|-------|--------|
| Feni         | 44  | 62±87   | 16 | 19 | 43.2% | 36.4% | 6.8%  | 79.4% | 28.9%  | 17.4% | 11.4% | 14.3%  |
| Gaibandha    | 67  | 22±87   | 5  | 45 | 67.2% | 64.2% | 3.0%  | 7.7%  | 99.3%  | 1.2%  | 98.1% | -32.1% |
| Gazipur      | 42  | 4±24    | 1  | 11 | 26.2% | 26.2% | 0.0%  | 8.2%  | 77.7%  | 1.6%  | 76.1% | -51.5% |
| Gopalganj    | 34  | 229±153 | 32 | 8  | 23.5% | 5.9%  | 17.6% | 99.4% | 27.4%  | 12.6% | 14.8% | -3.9%  |
| Habiganj     | 56  | 23±47   | 6  | 40 | 71.4% | 69.6% | 1.8%  | 61.9% | 88.6%  | 3.0%  | 85.6% | -17.2% |
| Jaipurhat    | 40  | 1±2     | 0  | 30 | 75.0% | 75.0% | 0.0%  | 0.0%  | 99.9%  | 3.0%  | 96.9% | -24.9% |
| Jamalpur     | 61  | 15±35   | 4  | 39 | 63.9% | 57.4% | 6.6%  | 7.3%  | 99.4%  | 8.2%  | 91.2% | -35.4% |
| Jessore      | 61  | 76±81   | 32 | 11 | 18.0% | 13.1% | 4.9%  | 90.5% | 39.1%  | 18.4% | 20.7% | -21.0% |
| Jhalakati    | 14  | 54±144  | 2  | 0  | 0.0%  | 0.0%  | 0.0%  | 4.5%  | 0.3%   | 0.0%  | 0.3%  | -0.3%  |
| Jhenaidah    | 49  | 49±91   | 13 | 26 | 53.1% | 40.8% | 12.2% | 75.4% | 87.3%  | 41.4% | 45.8% | -34.2% |
| Khagrachhari |     |         |    |    |       |       |       | 0.3%  | 100.0% | 43.2% | 56.9% |        |
| Khulna       | 49  | 52±89   | 16 | 5  | 10.2% | 10.2% | 0.0%  | 75.4% | 51.6%  | 8.8%  | 42.8% | -41.4% |
| Kishoreganj  | 96  | 55±96   | 27 | 24 | 25.0% | 15.6% | 9.4%  | 68.7% | 38.2%  | 1.5%  | 36.7% | -13.2% |
| Kurigram     | 76  | 21±57   | 7  | 48 | 63.2% | 56.6% | 6.6%  | 14.9% | 99.3%  | 0.0%  | 99.3% | -36.1% |
| Kushtia      | 42  | 15±311  | 13 | 14 | 33.3% | 26.2% | 7.1%  | 25.1% | 77.7%  | 9.4%  | 68.2% | -44.3% |
| Lakshmipur   | 16  | 323±279 | 13 | 1  | 6.3%  | 0.0%  | 6.3%  | 77.3% | 3.3%   | 1.5%  | 1.8%  | 2.9%   |
| Lalmonirhat  | 39  | 1±3     | 0  | 23 | 59.0% | 59.0% | 0.0%  | 0.0%  | 99.9%  | 0.0%  | 99.9% | -40.9% |
| Madaripur    | 27  | 255±193 | 25 | 1  | 3.7%  | 0.0%  | 3.7%  | 93.6% | 16.5%  | 8.3%  | 8.1%  | -12.8% |
| Magura       | 29  | 25±53   | 4  | 6  | 20.7% | 17.2% | 3.5%  | 50.3% | 68.5%  | 32.5% | 36.1% | -47.8% |
| Manikganj    | 42  | 23±25   | 6  | 28 | 66.7% | 57.1% | 9.5%  | 79.9% | 90.4%  | 10.8% | 79.6% | -23.8% |
| Maulvibazar  | 48  | 17±39   | 3  | 34 | 70.8% | 66.7% | 4.2%  | 43.8% | 100.0% | 2.5%  | 97.5% | -29.2% |
| Meherpur     | 13  | 115±145 | 8  | 3  | 23.1% | 15.4% | 7.7%  | 89.3% | 84.6%  | 30.0% | 54.5% | -61.5% |
| Munshiganj   | 43  | 198±146 | 37 | 9  | 20.9% | 0.0%  | 21%   | 91.7% | 29.6%  | 11.6% | 18.1% | -8.7%  |
| Mymensingh   | 100 | 17±35   | 14 | 24 | 24.0% | 19.0% | 5.0%  | 12.5% | 72.5%  | 3.1%  | 69.4% | -48.5% |
| Naogaon      | 92  | 6±30    | 2  | 54 | 58.7% | 58.7% | 0.0%  | 0.1%  | 91.8%  | 7.2%  | 84.6% | -33.1% |
| Narail       | 23  | 92±99   | 10 | 5  | 21.7% | 8.7%  | 13.0% | 84.7% | 37.1%  | 17.1% | 20.0% | -15.3% |
| Narayanganj  | 28  | 52±97   | 7  | 7  | 25.0% | 17.9% | 7.1%  | 66.2% | 28.3%  | 6.6%  | 21.7% | -3.3%  |
| Narsingdi    | 54  | 43±64   | 15 | 15 | 27.8% | 18.5% | 9.3%  | 54.7% | 49.7%  | 1.0%  | 48.7% | -22.0% |

|            |    |         |    |    |       |       |       |       |        |       |        |        |
|------------|----|---------|----|----|-------|-------|-------|-------|--------|-------|--------|--------|
| Natore     | 51 | 1±3     | 0  | 11 | 21.6% | 21.6% | 0.0%  | 0.5%  | 79.1%  | 2.6%  | 76.5%  | -57.5% |
| Nawabganj  | 45 | 7±14    | 2  | 14 | 31.1% | 31.1% | 0.0%  | 6.3%  | 67.7%  | 6.0%  | 61.7%  | -36.6% |
| Netrokona  | 64 | 30±43   | 14 | 16 | 25.0% | 18.8% | 6.3%  | 66.7% | 36.4%  | 3.0%  | 33.4%  | -11.4% |
| Nilphamari | 47 | 2±5     | 0  | 34 | 72.3% | 72.3% | 0.0%  | 0.0%  | 100.0% | 0.0%  | 100.0% | -27.7% |
| Noakhali   | 32 | 231±167 | 30 | 1  | 3.1%  | 0.0%  | 3.1%  | 65.4% | 22.6%  | 3.8%  | 18.8%  | -19.4% |
| Pabna      | 78 | 32±90   | 13 | 33 | 42.3% | 32.1% | 10.3% | 11.0% | 82.5%  | 3.7%  | 78.8%  | -40.2% |
| Panchagarh | 39 | 3±6     | 0  | 27 | 69.2% | 69.2% | 0.0%  | 0.0%  | 99.6%  | 0.0%  | 99.6%  | -30.4% |
| Patuakhali | 2  | 7±6     | 0  | 1  | 50.0% | 50.0% | 0.0%  | 0.4%  | 1.8%   | 0.3%  | 1.5%   | 48.2%  |
| Pirojpur   | 33 | 42±74   | 8  | 2  | 6.1%  | 3.0%  | 3.0%  | 31.8% | 3.8%   | 0.7%  | 3.1%   | 2.3%   |
| Rajbari    | 33 | 50±91   | 8  | 17 | 51.5% | 42.4% | 9.1%  | 41.0% | 74.0%  | 22.5% | 51.5%  | -22.5% |
| Rajshahi   | 78 | 8±18    | 5  | 17 | 21.8% | 19.2% | 2.6%  | 5.9%  | 55.2%  | 1.8%  | 53.4%  | -33.4% |
| Rangamati  |    |         |    |    |       |       |       | 4.4%  | 99.4%  | 32.3% | 67.1%  |        |
| Rangpur    | 83 | 8±33    | 1  | 44 | 53.0% | 51.8% | 1.2%  | 3.8%  | 99.3%  | 0.0%  | 99.3%  | -46.3% |
| Satkhira   | 48 | 156±130 | 38 | 13 | 27.1% | 12.5% | 14.6% | 93.2% | 52.5%  | 7.5%  | 45.1%  | -25.5% |
| Shariatpur | 40 | 184±166 | 32 | 6  | 15.0% | 2.5%  | 12.5% | 91.1% | 8.0%   | 3.4%  | 4.6%   | 7.0%   |
| Sherpur    | 50 | 23±36   | 6  | 30 | 60.0% | 54.0% | 6.0%  | 24.4% | 99.7%  | 6.8%  | 92.9%  | -39.7% |
| Sirajganj  | 87 | 31±53   | 20 | 55 | 63.2% | 44.8% | 18.4% | 53.9% | 92.9%  | 4.3%  | 88.6%  | -29.7% |
| Sunamganj  | 13 | 41±62   | 2  | 6  | 46.2% | 46.2% | 0.0%  | 87.9% | 47.2%  | 3.1%  | 44.1%  | -1.1%  |
| Sylhet     | 67 | 19±28   | 12 | 46 | 68.7% | 55.2% | 13.4% | 41.8% | 99.8%  | 7.1%  | 92.8%  | -31.2% |
| Tangail    | 89 | 20±33   | 8  | 60 | 67.4% | 60.7% | 6.7%  | 35.7% | 94.6%  | 4.0%  | 90.6%  | -27.2% |
| Thakurgaon | 46 | 1±1     | 0  | 19 | 41.3% | 41.3% | 0.0%  | 0.0%  | 86.3%  | 0.0%  | 86.3%  | -45.0% |

## Supplementary Information References

- Annaduzzaman, M., Rietveld, L.C., Hoque, B.A., van Halem, D. (2022). Sequential Fe<sup>2+</sup> oxidation to mitigate the inhibiting effect of phosphate and silicate on arsenic removal. *Groundwater for Sustainable Development* 17, 100749.
- Chiew, H., Sampson, M.L., Huch, S., Ken, S., Bostick, B.C. (2009). Effect of Groundwater Iron and Phosphate on the Efficacy of Arsenic Removal by Iron-Amended BioSand Filters. *Environmental science & technology*. 43, 6295–6300.
- Ciardelli, M.C., Xu, H., Sahai, N. (2008). Role of Fe(II), phosphate, silicate, sulfate, and carbonate in arsenic uptake by coprecipitation in synthetic and natural groundwater. *Water Research* 42, 615–624.
- Charlet, L., & Polya, D. A. (2006). Arsenic in shallow, reducing groundwaters in southern Asia: An environmental health disaster. *Elements*, 2(2), 91–96.
- DPHE / BGS. (2001) Arsenic contamination of groundwater in Bangladesh. In *British Geological Survey Technical Report WC/00/19; 4 Volumes*; Kinniburgh, D. G., Smedley, P. L., Eds.; British Geological Survey: Keyworth, U.K.
- Fan, Y.; Li, H.; Miguez-Macho, G. (2013). Global patterns of groundwater table depth. *Science*, 339, 940–943.
- Friedl, M. A.; Sulla-Menashe, D.; Tan, B.; Schneider, A.; Ramankutty, N.; Sibley, A.; Huang, X. (2010). MODIS Collection 5 global land cover: Algorithm refinements and characterization of new datasets. *Remote sensing of Environment*, 114, (1), 168–182.
- Genç-Fuhrman, H., Bregnhøj, H., McConchie, D. (2005). Arsenate removal from water using sand–red mud columns. *Water Research*. 39, 2944–2954.
- Guan, X., Dong, H., Ma, J., Jiang, L. (2009). Removal of arsenic from water: Effects of competing anions on As(III) removal in KMnO<sub>4</sub>–Fe(II) process. *Water Research*. 43, 3891–3899.
- Hengl, T. (2018). Global landform and lithology class at 250 m based on the USGS global ecosystem map (Version 1.0). Lithology. Zenodo. Available online: <http://doi.org/10.5281/zenodo.1464846> (accessed on 1 October 2019).
- Hengl, T., De Jesus, J.M., Heuvelink, G.B., Gonzalez, M.R., Kilibarda, M., Blagotić, A., Shangguan, W., Wright, M.N., Geng, X., Bauer-Marschallinger, B. (2017). SoilGrids250m: Global gridded soil information based on machine learning. *PLoS ONE*, 12, e0169748.
- Hug, S. J., Leupin, O. X., & Berg, M. (2008). Bangladesh and Vietnam: Different groundwater compositions require different approaches to arsenic mitigation. *Environmental science & technology*, 42(17), 6318–6323.
- Islam, F. S., Gault, A. G., Boothman, C., Polya, D. A., Char-nock, J. M., Chatterjee, D., et al. (2004). Role of metal-reducing bacteria in arsenic release from Bengal delta sediments. *Nature*, 430(6995), 68–71.
- Lakshmanan, D., Clifford, D.A., Samanta, G. (2010). Comparative study of arsenic removal by iron using electrocoagulation and chemical coagulation. *Water Research*. 44, 5641–5652.
- Martinson, C.A., Reddy, K.J. (2009). Adsorption of arsenic(III) and arsenic(V) by cupric oxide nanoparticles. *Journal of Colloid and Interface Science*. 336, 406–411.
- McArthur, J. M., Banerjee, D. M., Hudson-Edwards, K. A., Mishra, R., Purohit, R., Ravenscroft, P., et al. (2004). Natural organic matter in sedimentary basins and its relation to arsenic in anoxic ground water: The example of West Bengal and its worldwide implications. *Applied Geochemistry*, 19(8), 1255–1293.
- Meng, X., Korfiatis, G. P., Christodoulatos, C., & Bang, S. (2001). Treatment of arsenic in Bangladesh well water using a household co-precipitation and filtration system. *Water research*, 35(12), 2805–2810.
- Nitzsche, K.S., Lan, V.M., Trang, P.T.K., Viet, P.H., Berg, M., Voegelin, A., Planer-Friedrich, B., Zahoransky, J., Müller, S.-K., Byrne, J.M., Schröder, C., Behrens, S., Kappler, A. (2015). Arsenic removal from drinking water by a household sand filter in Vietnam — Effect of filter usage practices on arsenic removal efficiency and microbiological water quality. *Science of The Total Environment*. 502, 526–536.
- Pelletier, J.D., Broxton, P.D., Hazenberg, P., Zeng, X., Troch, P.A., Niu, G., Williams, Z.C., Brunke, M.A., Gochis, D. (2016). Global 1-km Gridded Thickness of Soil, Regolith, and Sedimentary Deposit Layers, 2016; Available online: <https://doi.org/10.3334/ORNLDAAAC/1304> (accessed on 5 September 2019).
- Podgorski, J. E., Eqani, S. A. M. A. S., Khanam, T., Ullah, R., Shen, H., & Berg, M. (2017). Extensive arsenic contamination in high-pH unconfined aquifers in the Indus Valley. *Science advances*, 3(8), e1700935.
- Podgorski, J. E., Labhasetwar, P., Saha, D., & Berg, M. (2018). Prediction modeling and mapping of groundwater fluoride contamination throughout India. *Environmental science & technology*, 52(17), 9889–9898.
- Polya, D. A., & Charlet, L. (2009). Environmental science: Rising arsenic risk? *Nature Geoscience*, 2(6), 383–384.
- Polya, D.A., & Middleton, D.R.S. (2017) Arsenic in drinking water: sources & human exposure routes. In *Best Practice Guide for the Control of Arsenic in Drinking Water*, IWA Publishing, London, UK
- Polya, D. A., Sparrenbom, C., Datta, S., & Guo, H. (2019a). Groundwater arsenic biogeochemistry-key questions & use of tracers to understand arsenic-prone groundwater systems. *Geoscience Frontiers*, 10(5), 1635–1641.

- 
- Polya, D. A., Xu, L., Launder, J., Gooddy, D. C., & Ascott, M. (2019b). Distribution of arsenic hazard in public water supplies in the United Kingdom—methods, implications for health risks and recommendations. *Environmental arsenic in a changing world* (p. 22). Boca Raton: CRC Press.
- Richards, L. A., Parashar, N., Kumari, R., Kumar, A., Mondal, D., Ghosh, A., & Polya, D. A. (2022). Household and community systems for groundwater remediation in Bihar, India: Arsenic and inorganic contaminant removal, controls and implications for remediation selection. *Science of the Total Environment*, 830, 154580.
- Rodríguez-Lado, L., Sun, G., Berg, M., Zhang, Q., Xue, H., Zheng, Q., & Johnson, C. A. (2013). Groundwater arsenic contamination throughout China. *Science*, 341(6148), 866–868.
- Smedley, P. L., & Kinniburgh, D. G. (2002). A review of the source, behaviour and distribution of arsenic in natural waters. *Applied Geochemistry*, 17(5), 517–568.
- Trabucco, A., & Zomer, R.J. (2010). *Global Soil Water Balance Geospatial Database*. CGIAR Consortium for Spatial Information. Available from the CGIAR-CSI GeoPortal at: <https://cgiarcsi.community/> (accessed on 22 March 2019).
- Trabucco, A. & Zomer, R.J. (2009) *Global Aridity Index (Global-Aridity) and Global Potential Evapo-Transpiration (Global- PET) Geospatial Database*; CGIAR Consortium for Spatial Information Available from the CGIAR-CSI GeoPortal at: <https://cgiarcsi.community/> (Accessed on 18 February 2019).
- Tyrovola, K., Nikolaidis, N.P., Veranis, N., Kallithrakas-Kontos, N., Koulouridakis, P.E. (2006). Arsenic removal from geothermal waters with zero-valent iron—Effect of temperature, phosphate and nitrate. *Water Research*. 40, 2375–2386.
- van Halem, D., Olivero, S., de Vet, W.W.J.M., Verberk, J.Q.J.C., Amy, G.L., van Dijk, J.C. (2010). Subsurface iron and arsenic removal for shallow tube well drinking water supply in rural Bangladesh. *Water Research*. 44, 5761–5769.

**Disclaimer/Publisher's Note:** The statements, opinions and data contained in all publications are solely those of the individual author(s) and contributor(s) and not of MDPI and/or the editor(s). MDPI and/or the editor(s) disclaim responsibility for any injury to people or property resulting from any ideas, methods, instructions or products referred to in the content.
